On the role of Nav1.7 sodium channels in chronic pain: an experimental and computational study

Alberto Capurro<sup>1\*</sup>, Jack Thornton<sup>1</sup>, Bruno Cessac<sup>2</sup>, Lyle Armstrong<sup>1</sup>, Evelyne Sernagor<sup>1</sup>

1. Biosciences Institute, Faculty of Medical Sciences, Newcastle University, UK.

2. Université Côte d'Azur, Inria, Biovision team, France.

This manuscript has been withdrawn by the authors as they no longer stand by part of their conclusions and wish not to be cited for this work. If you have any questions, please contact the corresponding authors.
